# Supplementary material for: Tolerance and efficacy of targeted therapies prescribed for off-label indications in refractory systemic autoimmune diseases: data of the first 100 patients enrolled in the TATA registry (TArgeted Therapy in Autoimmune Diseases)
Source: HighWire-hosted journal article supplement (doi:10.1136/rmdopen-2022-002324), 2022-11-01
Supplement: rmdopen-2022-002324supp001_data_supplement.pdf [file rmdopen-2022-002324supp001_data_supplement.pdf]

| Supplementary Table 1. Predominant disease manifestations that led to the off-label treatments |               |
|------------------------------------------------------------------------------------------------|---------------|
|                                                                                                | % of patients |
| Multiple organ involvement                                                                     | 51%           |
| Articular                                                                                      | 14%           |
| Lung                                                                                           | 13%           |
| Skin                                                                                           | 7%            |
| Kidney                                                                                         | 6%            |
| Muscle                                                                                         | 5%            |
| Heart                                                                                          | 4%            |
